# Supplementary material
Source: publisher figshare collection journal article supplement (https://aacr.figshare.com/articles/dataset/_/22674933)
Supplement: Supplementary file 1 [file 40244730]

**Supplementary-Table-2. Diagnostic work-up for suspected ICI-myocarditis and evaluation of severity criteria (adapted from(1))**

| Work-up and evaluation                                                                                                                                                                                                                                                    |                                                                                                                                                                                                                                                                                                                                                                                                                                                                                                                                                                                                                                                                                 |                                                                                                                                                                                                                                                                                  |
|---------------------------------------------------------------------------------------------------------------------------------------------------------------------------------------------------------------------------------------------------------------------------|---------------------------------------------------------------------------------------------------------------------------------------------------------------------------------------------------------------------------------------------------------------------------------------------------------------------------------------------------------------------------------------------------------------------------------------------------------------------------------------------------------------------------------------------------------------------------------------------------------------------------------------------------------------------------------|----------------------------------------------------------------------------------------------------------------------------------------------------------------------------------------------------------------------------------------------------------------------------------|
| Investigation                                                                                                                                                                                                                                                             | Diagnosis                                                                                                                                                                                                                                                                                                                                                                                                                                                                                                                                                                                                                                                                       | Prognosis (severity criteria)                                                                                                                                                                                                                                                    |
| <b>ECG, Holter ECG, telemetry</b><br>- ECG are particularly useful when compared to pre-ICI baseline ECG(2,3)                                                                                                                                                             | - Tachycardia<br>- QRS duration lengthening and voltage decrease<br>- QTc lengthening<br>- Appearance of conductive disorders (sinus dysfunction, bundle branch & atrio-ventricular blocks), ventricular arrhythmias, premature ventricular contractions and pathological Q-waves                                                                                                                                                                                                                                                                                                                                                                                               | - Decreased QRS voltage (Sokoloff-Lyon index) / Micro-voltage<br>- Appearance of pathological Q-waves<br>- Appearance of high degree atrio-ventricular blocks (up to 25%)<br>- Appearance of ventricular arrhythmias (up to 25%)                                                 |
| Cardio-muscular circulating <b>biomarkers</b> (troponins, creatine kinase)(1,4)<br>- Biomarkers are particularly useful when compared to pre-ICI baseline values as they may be already abnormal in a subset of patients(5)                                               | - Troponins increased in almost all patients (high sensitivity; >90%)<br>- Creatine kinase increased in over three-quarter of patients<br>- Caution in interpretation when concurrent cardiotoxic drug is used in combination with ICI (anti-angiogenics, anthracyclines, ...)(5)                                                                                                                                                                                                                                                                                                                                                                                               | - Resistance to immunosuppressant treatment is likely evaluable by troponin-T kinetics evolution(1,4)                                                                                                                                                                            |
| <b>Echocardiography(1,3,6)</b>                                                                                                                                                                                                                                            | - Often (>50%) normal<br>- Possible appearance of decreased LVEF or decreased LV longitudinal strain or LV motion abnormality (non-Takotsubo pattern)                                                                                                                                                                                                                                                                                                                                                                                                                                                                                                                           | - Conflicting data on LV longitudinal strain<br>- Systolic dysfunction leading to acute symptomatic heart failure                                                                                                                                                                |
| Cardiac and/or muscular <b>pathology(1,7,8)</b>                                                                                                                                                                                                                           | - Definite diagnosis established when identification of T-cells and macrophages infiltrating muscles with associated myocytes death                                                                                                                                                                                                                                                                                                                                                                                                                                                                                                                                             | - Unclear                                                                                                                                                                                                                                                                        |
| <b>Cardiac MRI(6,9-11)</b><br>- Caution concerning a high proportion of pre-existing abnormality before ICI start and expected T1/T2 mapping alteration on ICI in non-myocarditis ICI treated cancer patients(9)                                                          | - Variable sensitivity (25-75%); poorer when realized soon upon first suspicion<br>- Multi-parametric criteria for cardiac tissue assessment (seeking for fibrosis, edema) required using quantitative T1/T2 mapping and late gadolinium enhancement with variable levels of certainty for diagnosis<br>- Possible appearance of decreased LVEF or decreased LV longitudinal strain or LV motion abnormality (non-Takotsubo pattern)                                                                                                                                                                                                                                            | - Conflicting data on LV late gadolinium enhancement<br>- Unclear for quantitative analysis relying on T1/T2 mapping<br>- Systolic dysfunction leading to acute heart failure                                                                                                    |
| Search for concomitant and severity of <b>myositis</b> frequently associated with myocarditis(12-15)<br>- Clinical assessment<br>- Pulmonary functional respiratory tests<br>- Electromyogram<br>- Muscle MRI<br>- Blood capnia<br>- Diaphragm imaging (echography, MRI)# | - Clinical signs of concurrent myositis (myalgia, muscles weaknesses), eventually presenting as myasthenia-gravis syndrome (ptosis, diplopia, dysphagia, dysphonia, dyspnea, abdominal paradoxical breathing)<br>- Pulmonary functional respiratory test identifying respiratory muscles dysfunction identified by presence of restrictive ventilatory defect, and/or vital capacity drop >15% in the supine position<br>- Electromyogram with a myopathic pattern and normal repetitive nerve stimulation test (no neuromuscular junction function disorder)<br>- Muscle MRI identifying hypersignals (muscle edema on T2-sequences)<br>- Blood capnia to evaluate hypercapnia | - Overt respiratory muscle failure leading to hypercapnia(3,14)<br>- Dysphagia requiring (par)enteral nutrition<br>- Myositis symptoms impairing significantly quality of life<br>- Role of diaphragm imaging and phrenic nerve electromyogram evaluation to be further assessed |
| Search for concomitant <b>hepatitis(13)</b>                                                                                                                                                                                                                               | - hepatic biomarkers often abnormally increased                                                                                                                                                                                                                                                                                                                                                                                                                                                                                                                                                                                                                                 | - Unclear                                                                                                                                                                                                                                                                        |
| <i>Require further assessment:</i><br>Brain Natriuretic Peptide (BNP), or NT-proBNP(1)                                                                                                                                                                                    | - Might be increased<br>- Association with heart failure to be confirmed in this setting                                                                                                                                                                                                                                                                                                                                                                                                                                                                                                                                                                                        | - Unclear                                                                                                                                                                                                                                                                        |
| <i>Exams guided by physician judgment:</i> Chest X-ray, stress test, thoracic & cardiac/coronary scanner, coronary angiogram, PET scanner, c-reactive protein, creatinine, cell blood count with differential, D-dimers                                                   | - Rule-out an alternative diagnosis (cardiac thrombus, metastasis, pulmonary embolism, systemic infection, cardiac ischemia, acute coronary syndrome, pneumothorax, kidney failure, Tako-tsubo, ...)<br>- Cardiac 18FDG PET-scanner is poorly sensitive for ICI-myocarditis(16)                                                                                                                                                                                                                                                                                                                                                                                                 | - Concurrent association between ICI-myocarditis and acute coronary syndrome requiring urgent revascularization occurring in up to 10% of cases is a predictor of poor outcomes.(17) Caution is required to not delay an eventual diagnosis of ICI-myocarditis.                  |

*Abbreviations:* FDG: Fluoro-desoxy-glucose ; ICI: immune checkpoint inhibitors ; LV(EF): left ventricular ejection fraction ; MRI: magnetic resonance imaging

# Deserve further evaluation to establish norms and standards in control cancer population on ICI with no myotoxicities

## REFERENCES

1. Lehmann LH, Cautela J, Palaskas N, Baik AH, Meijers WC, Allenbach Y, *et al.* Clinical Strategy for the Diagnosis and Treatment of Immune Checkpoint Inhibitor-Associated Myocarditis: A Narrative Review. *JAMA Cardiol* **2021**;6(11):1329-37 doi 10.1001/jamacardio.2021.2241.
2. Power JR, Alexandre J, Choudhary A, Ozbay B, Hayek S, Asnani A, *et al.* Electrocardiographic Manifestations of Immune Checkpoint Inhibitor Myocarditis. *Circulation* **2021**;144(18):1521-3 doi 10.1161/CIRCULATIONAHA.121.055816.
3. Power JR, Alexandre J, Choudhary A, Ozbay B, Hayek SS, Asnani A, *et al.* Association of early electrical changes with cardiovascular outcomes in immune checkpoint inhibitor myocarditis. *Arch Cardiovasc Dis* **2022**;115(5):315-30 doi 10.1016/j.acvd.2022.03.003.
4. Wang C, Lin J, Wang Y, Hsi DH, Chen J, Liu T, *et al.* Case Series of Steroid-Resistant Immune Checkpoint Inhibitor Associated Myocarditis: A Comparative Analysis of Corticosteroid and Tofacitinib Treatment. *Front Pharmacol* **2021**;12:770631 doi 10.3389/fphar.2021.770631.
5. Rini BI, Moslehi JJ, Bonaca M, Schmidinger M, Albiges L, Choueiri TK, *et al.* Prospective Cardiovascular Surveillance of Immune Checkpoint Inhibitor-Based Combination Therapy in Patients With Advanced Renal Cell Cancer: Data From the Phase III JAVELIN Renal 101 Trial. *J Clin Oncol* **2022**:JCO2101806 doi 10.1200/JCO.21.01806.
6. Cadour F, Cautela J, Rapacchi S, Varoquaux A, Habert P, Arnaud F, *et al.* Cardiac MRI Features and Prognostic Value in Immune Checkpoint Inhibitor-induced Myocarditis. *Radiology* **2022**:211765 doi 10.1148/radiol.211765.
7. Palaskas NL, Segura A, Lelenwa L, Siddiqui BA, Subudhi SK, Lopez-Mattei J, *et al.* Immune checkpoint inhibitor myocarditis: elucidating the spectrum of disease through endomyocardial biopsy. *Eur J Heart Fail* **2021**;23(10):1725-35 doi 10.1002/ejhf.2265.
8. Champion SN, Stone JR. Immune checkpoint inhibitor associated myocarditis occurs in both high-grade and low-grade forms. *Mod Pathol* **2020**;33(1):99-108 doi 10.1038/s41379-019-0363-0.
9. Faron A, Isaak A, Mesropyan N, Reinert M, Schwab K, Sirokay J, *et al.* Cardiac MRI Depicts Immune Checkpoint Inhibitor-induced Myocarditis: A Prospective Study. *Radiology* **2021**;301(3):602-9 doi 10.1148/radiol.2021210814.
10. Thavendiranathan P, Zhang L, Zafar A, Drobni ZD, Mahmood SS, Cabral M, *et al.* Myocardial T1 and T2 Mapping by Magnetic Resonance in Patients With Immune Checkpoint Inhibitor-Associated Myocarditis. *J Am Coll Cardiol* **2021**;77(12):1503-16 doi 10.1016/j.jacc.2021.01.050.
11. Zhang L, Awadalla M, Mahmood SS, Nohria A, Hassan MZO, Thuny F, *et al.* Cardiovascular magnetic resonance in immune checkpoint inhibitor-associated myocarditis. *Eur Heart J* **2020**;41(18):1733-43 doi 10.1093/eurheartj/ehaa051.
12. Salem JE, Manouchehri A, Moey M, Lebrun-Vignes B, Bastarache L, Pariente A, *et al.* Cardiovascular toxicities associated with immune checkpoint inhibitors: an observational, retrospective, pharmacovigilance study. *Lancet Oncol* **2018**;19(12):1579-89 doi 10.1016/S1470-2045(18)30608-9.
13. Nguyen LS, Cooper LT, Kerneis M, Funck-Brentano C, Silvain J, Brechot N, *et al.* Systematic analysis of drug-associated myocarditis reported in the World Health Organization pharmacovigilance database. *Nat Commun* **2022**;13(1):25 doi 10.1038/s41467-021-27631-8.
14. Aldrich J, Pundole X, Tummala S, Palaskas N, Andersen CR, Shoukier M, *et al.* Inflammatory Myositis in Cancer Patients Receiving Immune Checkpoint Inhibitors. *Arthritis Rheumatol* **2021**;73(5):866-74 doi 10.1002/art.41604.
15. Allenbach Y, Anquetil C, Manouchehri A, Benveniste O, Lambotte O, Lebrun-Vignes B, *et al.* Immune checkpoint inhibitor-induced myositis, the earliest and most lethal complication among rheumatic and musculoskeletal toxicities. *Autoimmun Rev* **2020**;19(8):102586 doi 10.1016/j.autrev.2020.102586.

16. Ederhy S, Devos P, Pinna B, Funck-Brentano E, Abbar B, Fenioux C, *et al.* (18)F-fluorodeoxyglucose positron emission tomography/computed tomography imaging for the diagnosis of immune checkpoint inhibitor-associated myocarditis. *Arch Cardiovasc Dis* **2022**;115(2):114-6 doi 10.1016/j.acvd.2021.12.001.
17. Nowatzke J, Guedeney P, Palaskas N, Lehmann L, Ederhy S, Zhu H, *et al.* Coronary artery disease and revascularization associated with immune checkpoint blocker myocarditis: Report from an international registry. *Eur J Cancer* **2022**;177:197-205 doi 10.1016/j.ejca.2022.07.018.
